# Supplementary material for: The responses of root morphology and phosphorus-mobilizing exudations in wheat to increasing shoot phosphorus concentration
Source: PubMed Central journal article supplement (PMC6185719; doi:10.1093/aobpla/ply054), 2018-09-20
Supplement: ply054_suppl_supplementary_materials.pdf [file ply054_suppl_supplementary_materials.pdf]

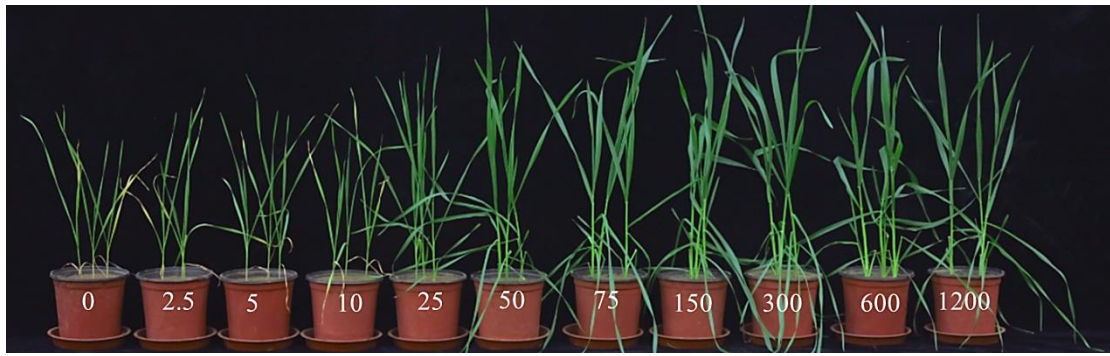

**Fig. S1** The response of wheat shoots to different P fertilization rates (in mg P kg<sup>-1</sup> soil) at the harvest time (37 days after planting).

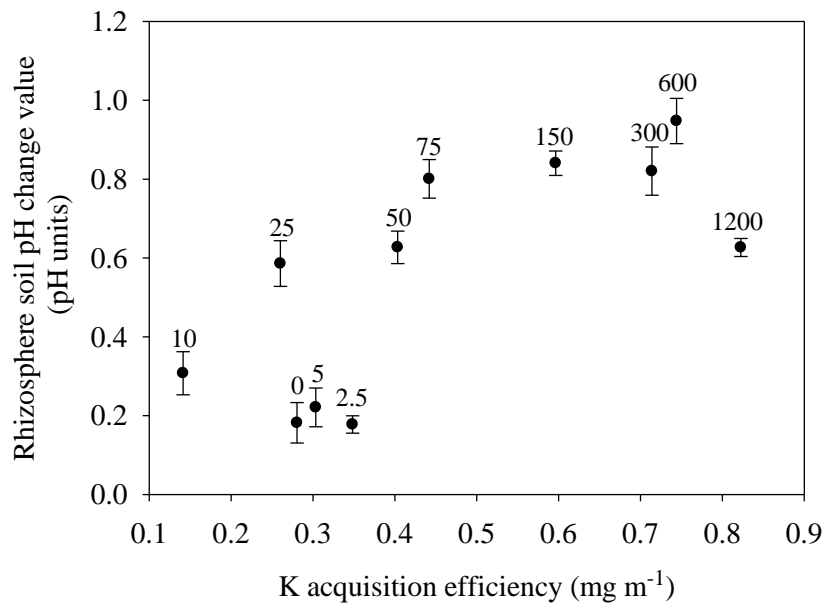

**Fig. S2** The rhizosphere soil pH change (bulk soil pH minus rhizosphere soil pH) with K acquisition efficiency (total K uptake divide total root length). Each symbol represents the mean of five replicates ( $\pm$ SD). The numbers above each symbol indicate P added rates (mg kg<sup>-1</sup>).
